# Supplementary material
Source: PubMed Central journal article supplement (PMC5601012)
Supplement: NIHMS905589-supplement-2.pdf [file NIHMS905589-supplement-2.pdf]

## Supplementary data

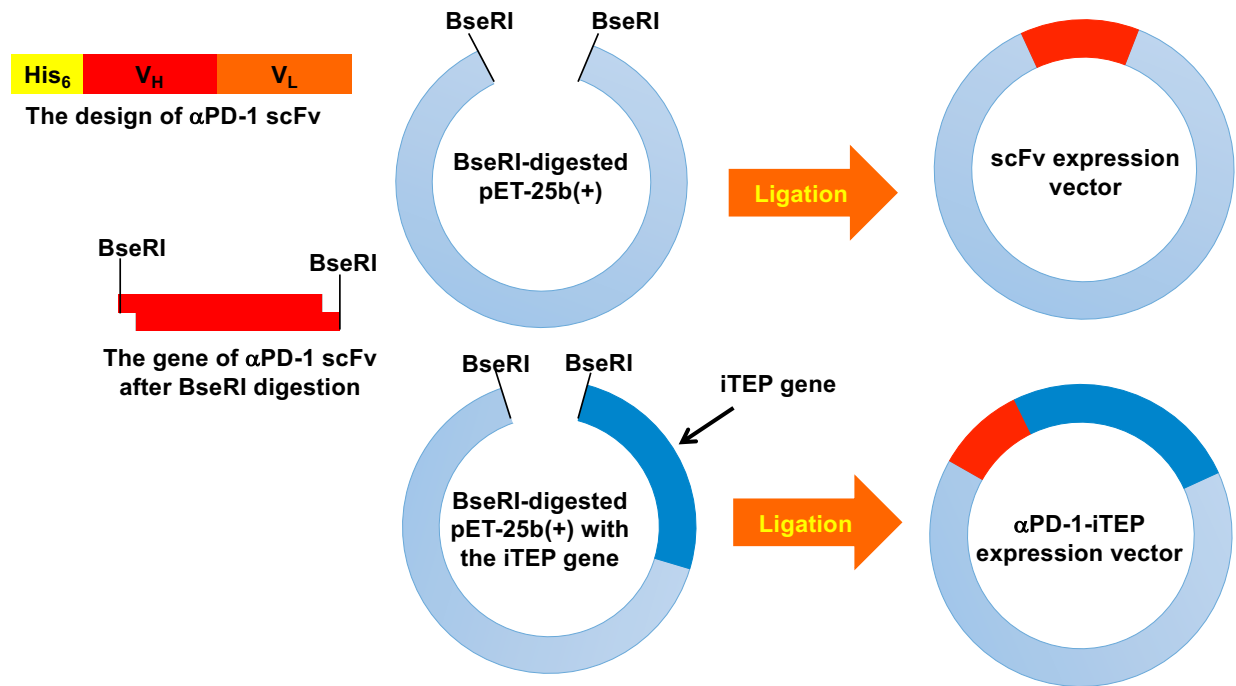

**Supplementary Figure 1.** A scheme about the process of generating expression vectors of  $\alpha$ PD-1 scFv and the  $\alpha$ PD-1-iTEP fusion. The synthesized gene of the scFv was digested with the BseRI enzyme. Meanwhile, the pET-25b(+) vector and the iTEP gene-included pET-25b(+) vector were both digested with the BseRI enzyme. The digested scFv gene was ligated to the two digested vectors to create the expression vectors for scFv and  $\alpha$ PD-1-iTEP fusion, respectively.
